# Supplementary material for: The impact of data assimilation on the prediction of Asian desert dust using an operational 4D-Var system
Source: Copernicus journal article supplement (doi:10.5194/acp-2018-78), 2018-04-10
Supplement: Supplementary file [file acp-2018-78-AC1-supplement.pdf]

Reply to Reviewer #1:

Many thanks to the reviewer for all the useful comments. Please find our point-by-point answers below.

**1. The title of this paper explicitly indicates that the paper is to address the impact of data assimilation on the prediction of Asian dust. However, after reading the entire paper, I feel that the paper is not particularly focused on dust forecast, and only one dust episode is shown. The evaluation of AOD with AERONET is done within an extensive region and large fraction of the area has limited influence from dust. If choosing 1020 nm AOD is for its better representation of dust, it should be clearly stated in the paper.**

*We take the reviewer's point and hence changed the title of the paper to "The value of satellite observations in the analysis and short-range prediction of Asian dust" which reflects better the content and the scope of the paper. As far as wavelength for verification, there is no 550 (or 500nm) in the CARSNET data, that is why the 1020nm was initially chosen (for selected statistics). In the revised version of the paper now we consistently use the 440nm for all verification measures.*

**2. In the abstract it is said that the model experiments were run to understand the relative contribution of Asian dust to air quality over China, but there is no any results or discussion on this topic in the paper.**

*We agree with the reviewer in his/her critique of the paper. The abstract has been changed to clarify that the focus is on aerosol optical depth monitoring rather than air quality.*

**3. There is not enough data used in the paper (only one month) to generate robust statistics. It is stated in the introduction that the model experiments were run for one year, but only March results are used in the paper. We know that the dust season in China lasts more than just a month in March, why not using multiple months to have more data for statistics? I also noted the statement that "ECMWF is providing twice-daily forecasts of atmospheric composition (including desert dust) up to 5 days ahead", so potentially there is a lot of results to use.**

*Statistics for three months (March-May) are now presented for the AOD verification.*

**4. The impact of assimilation to surface PM10 should be much better and more quantitatively evaluated. From Figure 9, it is clear that PM10 from the three model experiments are nearly identical and the satellite AOD assimilation brings little improvements of PM10 prediction. Although DTDB is seen to be a little closer to the observations at some time steps, the so-called "improvements" are practically negligible and do not change the forecast skill at all. Please provide quantitative evaluation in this case, including peak values and timing, bias, correlation, etc. that can show the difference among the three model experiments and between model runs and observations to really understand the magnitude of "better agreement".**

**5. Actually, the PM10 case is a very interesting one that warrants a more in-depth analysis. In the three-day simulations shown in Figure 9, what are the AOD time series look like, compared with AERONET (and/or CARSNET) AOD in the Beijing municipal area? Does AOD and PM10 vary together or not? Can you explain the AOD-PM10 relationship in terms of aerosol vertical profile, composition, and other factors (e.g., hygroscopic growth of aerosols)? What do the results tell us about model characteristics and the effectiveness of AOD assimilation for PM10 forecast?**

**6. The assessment needs to be more objective, more robust, and more quantitative. For example, within the year of 2013, how many days of heavy dust episodes the CONTROL experiment would miss but DT or DTDB would capture? How significant improvements the assimilation brings in heavy dust (or pollution) cases and in background cases?**

*We take the above points made by the reviewer. It is true that the model has high predictive skill in Aerosol Optical Depth, but low predictive skill when it comes to surface concentrations. This in itself would warrant a more in-depth study. However, within the scope of the current paper, we have restricted ourselves to study the impact of the assimilation of satellite data for the monitoring and short-range prediction of aerosol load as described by the optical depth. The model skill is quantitatively shown to be improved for aerosol optical depth when satellite data are assimilated by comparing with ground-based, independent, measurement of aerosol optical depth. However, the picture is not so clear-cut for the surface concentrations. The global model, run at 80km resolution, is not capable to resolve local pollution features and the complex topography that, particularly in China, is responsible for pockets of extreme values of particulate matter. In a sense, using this model to address the prediction of PM10 is an ill-posed problem. We prefer hence to only show a qualitative assessment of the PM10 which shows an indication of the potential of the model in identifying large synoptic events; we discuss the limitations of the use of a coarse-resolution model to provide prediction of local pollution; and we suggest the use of the global model to provide boundary conditions for high-resolution regional models that can provide a more accurate depiction of the particulate matter. Considering a re-focusing of the paper, the comments of the reviewer are addressed below.*

**Minor comments:**

**Page 2, line 3: Add Taklimakan as a desert of dust source.**

*This was added.*

**Page 2, line 18: Typo and incomplete sentence “since 2005ch is .”**

*Typo was corrected*

**Page 4, line 6: Is the prescribed dry deposition velocity particle size dependent? Does it depend on seasons and locations?**

*Yes, the dry deposition is size dependent - it is parameterized as a modification of the instantaneous surface flux by what comes down from the layer just above the surface. In that sense, it does vary temporally and spatially.*

**Page 4, line 7, sedimentation: This is strange - you could argue that the errors might be insignificant for the two smaller size groups from ignoring sedimentation, but using a fixed settling velocity is not justified, since the air density and viscosity changes spatially and temporally.**

*That sentence was removed as the sedimentation is actually applied to all sizes for sea salt and dust in the model version used for these experiments.*

**Page 4, line 10: “bulk parameterization” is for particle size, right?**

*Yes, meaning that there is only one tracer representing the mass of the carbonaceous aerosols and of SO<sub>4</sub>. For desert dust and sea salt, the size information is actually represented by tracers in the three size bins.*

**Page 4, line 12-13, “Removal processes include sedimentation of all particles”: This**

**sentence directly contradicting with the sentence in line 7 that “sedimentation is applied only to the largest dust bin”.**

*This was in fact wrong and has been changed.*

**Page 4, line 14: How is sulphate formation from SO<sub>2</sub> is dealt with in the model?**

*Sulphate is formed from SO<sub>2</sub> using a parameterization based on RH and temperature following Eatough et al. (1994) and latitude following Huneeus et al., 2009.*

**Page 4, line 23: What “atmospheric composition variables” are assimilated that are relevant to this study?**

*Directly relevant to this study only the aerosol mixing ratio. That phrase was intended to be more general and to describe the CAMS system which has the capability to assimilate ozone, SO<sub>2</sub>, CO, NO<sub>x</sub>, etc.*

**Page 4, line 24-26: How do you deal with the aerosol hygroscopic growth? How do you factor that in when you redistribute the aerosol mixing ratio at the end of minimization?**

*The hygroscopic growth for sea salt is parameterized according to Tang et al (1997). The conversion from hydrophobic to hydrophilic organic matter and black carbon follows an exponential law with conversion rate  $7.1E-06_{JPRB}$ , following Boucher et al (2002). This treatment is detailed in Morcrette et al (2009), referenced in the paper.*

*At the beginning of the minimization the total mass is calculated as the sum of all contributing aerosol species at that specific location. The fractional contribution of each species is maintained constant over the 12-h assimilation window. At the end of the minimization the increments on total aerosol mixing ratio are redistributed to the various species according to their fractional contribution calculated at the beginning. In a way, all aerosol physical processes are considered constant over the assimilation window and tendencies are not updated. This is of course an approximation.*

**Page 4, line 19-30, vertical profile: Please make it clear that the vertical profiles are all from the model; no data assimilation for aerosol vertical profiles.**

*This has been clarified and the following sentence has been added:*

*“The vertical profile of the aerosol mixing ratio is not modified by the assimilation as only AOD is used as observation. Thus, the vertical profile is dictated by the model.”*

**Page 5, line 32: Change “1” to “Figure 1”.**

*Added*

**Page 6, line 1 and Figure 1 and 2: The different spatial domains between Figure 1 and 2 makes it hard to visually relate the dust plume locations. I suggest make these two figures for the same geographic area or mark the Figure 2 area on Figure 1.**

*This has been addressed.*

**Page 6, line 3: From Figure 1, it looks that the dust storm originated in Taklimakan.**

*This has been clarified in the text.*

**Page 6, line 4: transported to southeast, instead of southwest?**

*The typo was corrected. The sentence now reads: “The storm originated in the Taklimakan and dust was first transported to Northeastern China and further transported to the southeast.”*

**Page 6, line 7: Are the observed values from AERONET and CARSNET? What is the**

**reason for using AOD at 1020 nm instead of 550 nm MODIS retrieved?**

*The AOD observations are from AERONET and CARSNET. Since CARSNET does not provide observations of AOD at 550nm, the 1020nm AOD was used instead in the previous version of the paper. This has been now changed to 440nm which is closer to 550nm.*

**Page 6, line 8-9, SE Asia are: This is a large area. The stations within this area must have quite different aerosol composition. How many of them are surely being impacted by dust in your analysis?**

*The area has been reduced to central/northern China (30-45N/75-135E). This will decrease the total number of stations, but increase the number of stations which are directly impacted by dust for the season under consideration.*

**Page 6, line 11-12: Four-digit after the decimal seems an over kill and means little. The differences are small: R = 0.74, 0.75, and 0.76. To what degree it matters? What are the RMSEs for these cases?**

*We think that there are enough observations being taken into account that perhaps in this case the decimal point might be significant.*

**Page 7, Figure 3: What do the different colors represent?**

*The figure represents 2-dimentional histograms where the colour represents the number in each bin.*

**Page 7, line 6-7: In the case of dust storms or episodes the “outliers” are probably the most critical ones for measuring the model skill.**

*This is surely true but for the rest of the verification period, the more “balanced” verification metrics do more justice to the model and are perhaps more robust.*

**Page 8, line 8-9: Can you quantify the model agreement with CARSNET and AERONET separately? Is there any collocated CARSNET and AERONET stations to compare the differences? Do they use the same type of instrument? What are the known uncertainties of their instruments? Any calibration issues?**

*We are only users of the data and provide references for the CARSNET and AERONET datasets. We are not aware of co-located stations.*

**Page 9, line 5: Change “AD” to “AOD”**

*Changed.*

**Page 9, line 10: Where is the summary given? Figure 8?**

*Yes, in figure 8. This has been added in the text for clarity.*

**Page 9, Section 4.2: It would be informative to know after how long the benefit of data assimilation disappears, and what does it tell us about the importance of the quality of the model itself.**

*This has been addressed by adding a new figure (Figure 9 in the revised version) with quantitative scores of model skill. There is evidence that up to 48 hours the benefits of satellite data assimilation are still felt in the short-range prediction. This is now discussed more in depth and for a longer verification period (March-May 2013).*

**Page 10, line 5-8: Too many subjective statements here. How much off is the timing that is “slight wrong”? What is the standard for “good agreement” (e.g., within x%)? What is the measure of the model skill that warrants the achievement of “a good degree of skill”? The evaluation is too descriptive and not quantitative.**

*We have acknowledged that the comparison with PM10 is qualitative and also that the skill of the model is low when predicting particular matter.*

**Page 10, line 8-10: “the experiments with assimilated satellite data draw closer to the observations”: How much closer? 1%, 5%, or 50%? The three lines in Figure 9 are nearly identical and I am not sure what matrix you use to benchmark the improvements? Clearly, quantitative assessment is needed. Can you use R, FB, and FGE for assess the results of PM10 here, similar to what you did for AOD, in order to quantitatively measure the effectiveness of assimilating satellite AOD on predicting PM10 concentrations?**

*It has been noted that the impact of satellite data on the monitoring of PM10 is limited to situations with clear synoptic structure, but otherwise the model has little skill due to coarse resolution, missing species, and unresolved local sources.*

**Page 10, line 10 (continued on Page 12 line 1), the “spurious secondary peak of March 10”: DTDB is about 370 ug/m<sup>3</sup>, which is probably 20 ug/m<sup>3</sup> lower than CONTROL, but still more than 300 ug/m<sup>3</sup> higher than the observation! It is hard to mark it as improvement.**

*This has been noted.*

**Relative question regarding Figure 9: It would be helpful to indicate the MODIS overpass time that the data are ingested in the assimilation system. Clearly, the nearly identical time series of the three model runs reflect the fundamental characteristics of the model processes, of which the satellite data assimilation is not able to change. The opposite diurnal variations between data and model do not change at all, the more than 2x over estimation from late Mar 08 to mid Mar 09 remains the same magnitude among the three model runs, and the model behavior in late mar 09 to Mar 10 does not change at all from CONTROL to DTDB after the strong dust episode in Mar 9. So what have we learned from it? To me, the figure has told me that the assimilation of satellite AOD (1 or 2 time/day?) in this case helps make small adjustment of PM10 but is unable to change the quality of forecast.**

*The main text and conclusions have been rewritten to highlight the weak points as discussed by the reviewer above. For example the concluding paragraph on the PM evaluation now reads: “Comparisons with PM10 data from the CEPA network for March-May 2013 in the Beijing area show that the model is has some skill in predicting the passage of a dust front. However there is a mismatch in PM10 values with large biases (up to an order of magnitude in some cases) displayed by the model, even for the assimilation experiments. The assimilation of*

*satellite AOD in this case helps make small adjustments to PM10 but is unable to change the quality of forecast. Despite this, the spatial patterns are well captured and the global model is able to capture the regional pollution patterns even at the coarse resolution. This indicates that the global model analyses may be used as boundary conditions for regional air quality models at higher resolution, enhancing their performance in situations when part of the pollution may have originated via large-scale mechanisms. However, the skill of the global model for PM10 is not as good as for AOD, due to model biases, coarse resolution, lack of resolved local emissions and lack of observations to constrain the aerosol speciation and vertical structure.”*

**Page 11, Figure 7: Please show statistics of the comparisons at each site. What are “gmsy”, “goij”, and “goik” in the legend?**

*gmsy is the CONTROL run, goij is the DT run and goik is the DTDB run.  
This has been corrected and the experiment names do not appear any longer in the plots.*

**Also, a general comment on the color scheme: model runs of CONTROL, DT, and DTDB are represented in green, red, and blue in Figure 6, but green, red, and gray (dashed line) in Figure 7, and yet, they are red, green, and blue in Figure 9! Please keep the color scheme and style consistent.**

*This has been corrected.*

**Page 12, Figure 8 caption: There are only two rows in Figure 8 and there is no “middle” row.**

*Typo corrected.*

**Page 12, line 9-10: As I mentioned again and again, the effectiveness of assimilating satellite data needs to be quantitatively assessed. The assessment of the impact on daily AOD (not just for dust) forecast is more quantitatively done, but the assessment of the impact of diurnal variation of PM10 is mostly addressed by visual impression and subjective.**

*We now acknowledge this explicitly. The global mode is not apt at representing local PM10 features, and that is clearly shown in the qualitative comparison. However, the passage of the dust front is visible in the model so we argue that the global model can be used for boundary conditions for high resolution air quality models which would give a more accurate representation of the local pollution.*
